# Supplementary material
Source: MDPI journal article supplement (https://www.mdpi.com/2073-4352/13/5/839)
Supplement: s1 [file s1]

# The Crystal Structure of Mg–Al–CO<sub>3</sub> Layered Double Hydroxide

Elena S. Zhitova <sup>1,\*</sup>, Rezeda M. Sheveleva <sup>1,2</sup>, Andrey A. Zolotarev <sup>1,2</sup> and Sergey V. Krivovichev <sup>2,3</sup>

<sup>1</sup> Institute of Volcanology and Seismology, Far East Branch of Russian Academy of Sciences, 683006 Petropavlovsk-Kamchatsky, Russia; st034435@student.spbu.ru (R.M.S.); andrei.zolotarev@spbu.ru (A.A.Z.)

<sup>2</sup> Saint-Petersburg State University, Saint-Petersburg 199034, Russia; s.krivovichev@ksc.ru

<sup>3</sup> Kola Science Centre, Apatity 189209, Russia

\* Correspondence: zhitova\_es@mail.ru

**Table S1.** Powder X-ray diffraction data for quintinite sample **91002**.

| $d_{\text{calc}}$ (Å) | $I_{\text{meas}}$ (%) | $h$ | $k$ | $l$ |
|-----------------------|-----------------------|-----|-----|-----|
| 7.56                  | 46                    | 0   | 0   | 2   |
| 4.571                 | 1                     | 0   | 1   | 0   |
| 3.779                 | 100                   | 0   | 0   | 4   |
| ?                     | 2                     | -   | -   | -   |
| 2.5998                | 11                    | 1   | 1   | 1   |
| 2.5195                | 22                    | 0   | 0   | 6   |
| 2.4916                | 8                     | 1   | 1   | 2   |
| 2.3379                | 8                     | 1   | 1   | 3   |
| 2.2856                | 2                     | 0   | 2   | 0   |
| 2.1638                | 9                     | 1   | 1   | 4   |
| 1.9882                | 9                     | 1   | 1   | 5   |
| 1.8896                | 5                     | 0   | 0   | 8   |
| 1.8224                | 21                    | 1   | 1   | 6   |
| 1.5364                | 4                     | 1   | 1   | 8   |
| 1.5237                | 23                    | 0   | 3   | 0   |

**Table S2.** Anisotropic displacement parameters (Å<sup>2</sup>) for quintinite samples **91002** and **C7029**.<sup>1</sup>

| Sample       | Atom | $U_{11}$  | $U_{22}$   | $U_{33}$   | $U_{23}$    | $U_{13}$  | $U_{12}$  |
|--------------|------|-----------|------------|------------|-------------|-----------|-----------|
| <b>91002</b> | Mg   | 0.0049(5) | 0.0049(4)  | 0.0110(7)  | 0           | 0         | 0.0024(2) |
|              | Al   | 0.0063(5) | 0.0063(5)  | 0.0195(11) | 0           | 0         | 0.0031(3) |
|              | O1   | 0.0091(8) | 0.0250(10) | 0.0108(8)  | -0.0029(9)  | 0.0037(9) | 0.0097(8) |
| <b>C7029</b> | Mg   | 0.0066(4) | 0.0066(4)  | 0.0170(6)  | 0           | 0         | 0.0033(2) |
|              | Al   | 0.0077(5) | 0.0077(5)  | 0.0218(9)  | 0           | 0         | 0.0038(2) |
|              | O1   | 0.0095(7) | 0.0306(10) | 0.0154(6)  | -0.0012(10) | 0.0017(9) | 0.0121(7) |

<sup>1</sup> O2, O3, C1 and C2 atoms have only isotropic displacement parameter.
